# Supplementary material
Source: PubMed Central journal article supplement (PMC8841102)
Supplement: NIHMS1775159-supplement-supp_files.pdf [file NIHMS1775159-supplement-supp_files.pdf]

## SUPPLEMENTAL MATERIALS – Cognitive performance in relation to hydration status and water intake among older adults, NHANES 2011-2014

By Hilary Bethancourt, William Larry Kenney, David Almeida, Asher Y. Rosinger

**Supplemental Figure 1.** Participant flow chart

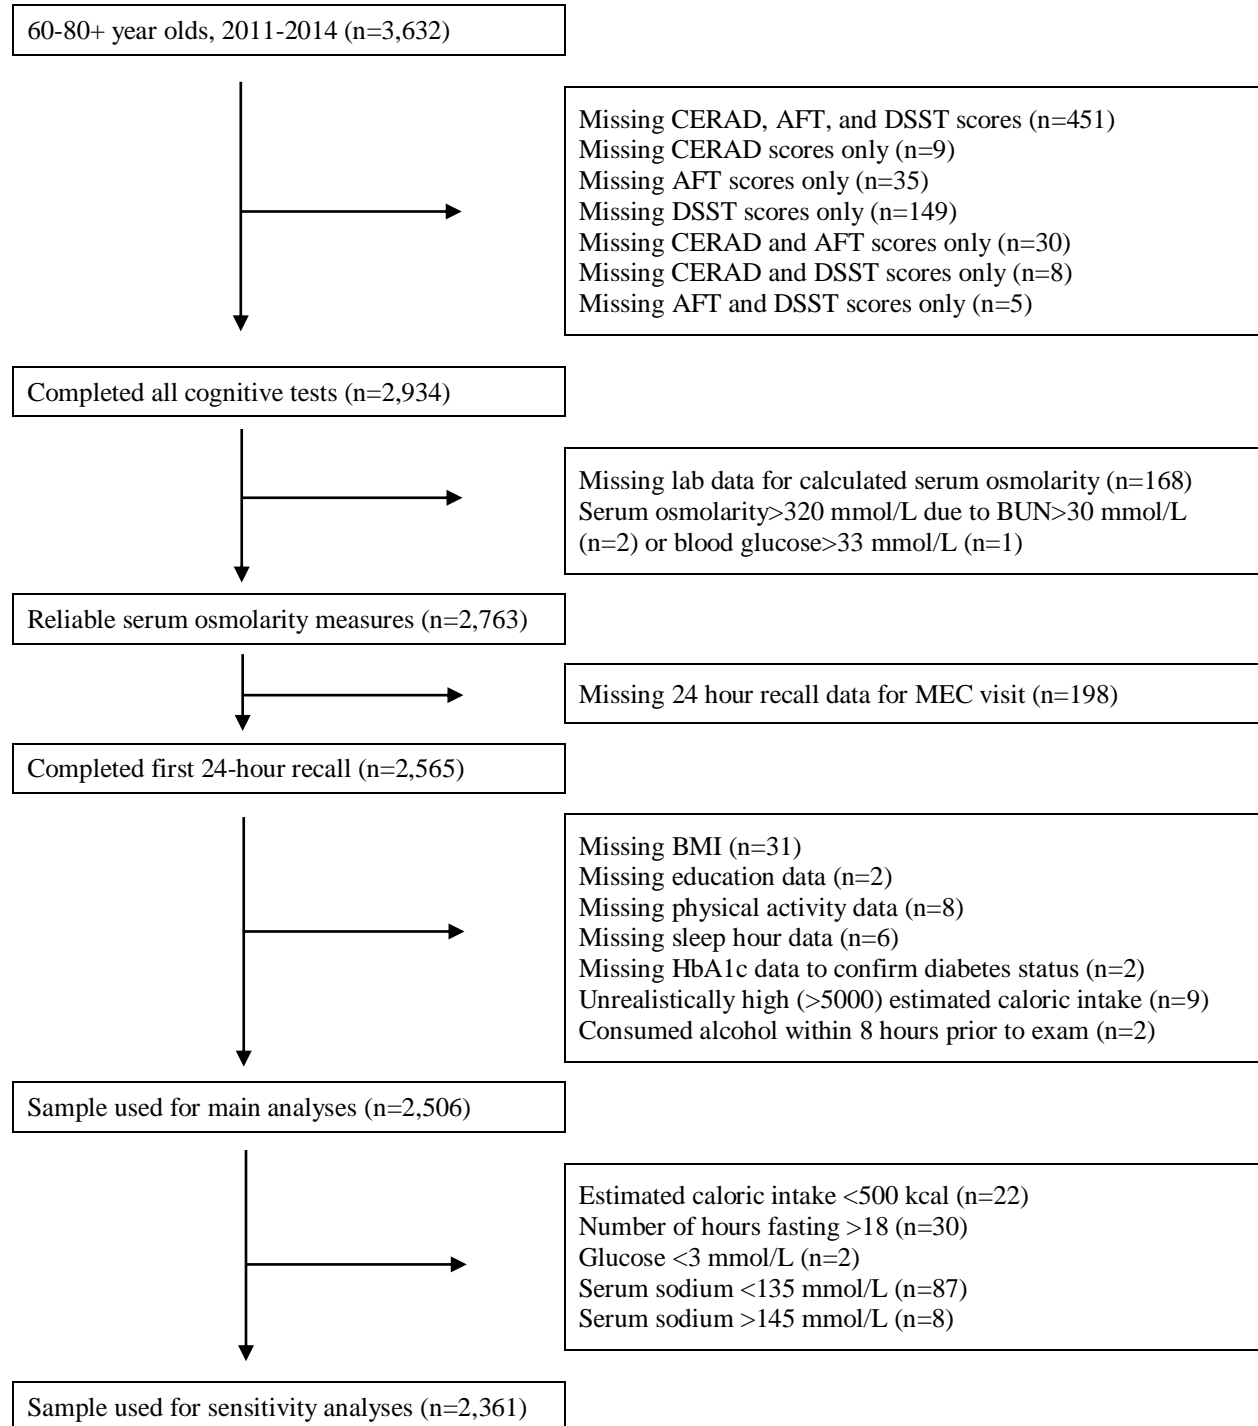

**Supplemental Table 1. Demographic, lifestyle, and health characteristics across categories of serum osmolarity, US adults  $\geq 60$  years old, NHANES 2011-2014.**

|                                                  | Sosm:<br><285 mmol/L<br>(n=125) |      | Sosm:<br>285-289 mmol/L<br>(n=377) |      | Sosm:<br>290-294 mmol/L<br>(n=896) |      | Sosm:<br>295-300 mmol/L<br>(n=793) |      | Sosm:<br>>300 mmol/L<br>(n=315) |      |
|--------------------------------------------------|---------------------------------|------|------------------------------------|------|------------------------------------|------|------------------------------------|------|---------------------------------|------|
|                                                  | Weighted<br>Means               | SE   | Weighted<br>Means                  | SE   | Weighted<br>Means                  | SE   | Weighted<br>Means                  | SE   | Weighted<br>Means               | SE   |
| Age (years):                                     |                                 |      |                                    |      |                                    |      |                                    |      |                                 |      |
| 60-64                                            | 37.0%                           | 6.2% | 35.4%                              | 2.7% | 37.0%                              | 2.3% | 29.7%                              | 2.6% | 19.8%                           | 3.0% |
| 65-69                                            | 20.5%                           | 4.7% | 29.9%                              | 4.1% | 25.4%                              | 2.1% | 23.7%                              | 2.1% | 17.8%                           | 2.6% |
| 70-74                                            | 15.4%                           | 3.9% | 16.9%                              | 2.8% | 17.9%                              | 1.5% | 18.3%                              | 1.9% | 25.2%                           | 3.0% |
| 75-79                                            | 11.4%                           | 4.0% | 9.7%                               | 1.7% | 9.6%                               | 1.2% | 12.2%                              | 1.4% | 11.5%                           | 2.0% |
| $\geq 80$                                        | 15.7%                           | 3.0% | 8.2%                               | 1.9% | 10.2%                              | 0.9% | 16.0%                              | 1.4% | 25.7%                           | 2.7% |
| Female (%)                                       | 61.0%                           | 6.8% | 57.1%                              | 4.0% | 55.1%                              | 2.3% | 50.7%                              | 2.4% | 48.2%                           | 3.1% |
| Education level:                                 |                                 |      |                                    |      |                                    |      |                                    |      |                                 |      |
| <High school education                           | 86.9%                           | 2.6% | 79.3%                              | 2.7% | 78.2%                              | 2.3% | 78.6%                              | 2.2% | 82.7%                           | 2.7% |
| High school graduate                             | 3.8%                            | 1.1% | 8.4%                               | 1.4% | 8.7%                               | 1.5% | 8.2%                               | 1.4% | 7.4%                            | 1.4% |
| Some college                                     | 4.2%                            | 1.3% | 6.9%                               | 1.2% | 7.7%                               | 1.3% | 7.5%                               | 1.5% | 7.1%                            | 1.8% |
| College graduate+                                | 5.0%                            | 1.6% | 5.5%                               | 1.4% | 5.4%                               | 1.0% | 5.7%                               | 0.8% | 2.8%                            | 0.8% |
| BMI (kg/m <sup>2</sup> )                         | 27.5                            | 1.3  | 27.9                               | 0.5  | 29.5                               | 0.3  | 29.1                               | 0.3  | 29.8                            | 0.6  |
| Moderate and vigorous activity<br>(minutes/week) | 358                             | 56   | 388                                | 39   | 481                                | 55   | 382                                | 27   | 295                             | 30   |
| Hours of sleep:                                  |                                 |      |                                    |      |                                    |      |                                    |      |                                 |      |
| Sleep $\leq 6$ hours                             | 26.3%                           | 5.2% | 30.3%                              | 3.0% | 30.4%                              | 1.4% | 23.4%                              | 1.7% | 29.0%                           | 2.6% |
| Sleep 7-8 hours                                  | 62.7%                           | 6.0% | 60.7%                              | 2.7% | 60.3%                              | 2.0% | 67.6%                              | 2.8% | 54.7%                           | 3.1% |
| Sleep $\geq 9$ hours                             | 11.1%                           | 4.4% | 9.0%                               | 1.6% | 9.4%                               | 1.2% | 9.0%                               | 1.7% | 16.2%                           | 2.4% |
| Session Time:                                    |                                 |      |                                    |      |                                    |      |                                    |      |                                 |      |
| Morning                                          | 36.0%                           | 4.7% | 44.7%                              | 3.8% | 50.5%                              | 2.6% | 54.8%                              | 2.4% | 52.6%                           | 4.5% |
| Midday                                           | 50.2%                           | 4.5% | 44.6%                              | 3.6% | 39.1%                              | 2.2% | 37.1%                              | 2.1% | 38.0%                           | 3.6% |
| Afternoon                                        | 13.8%                           | 5.0% | 10.6%                              | 2.1% | 10.4%                              | 2.1% | 8.1%                               | 1.1% | 9.4%                            | 1.9% |

**Supplemental Table 1 (Continued). Demographic, lifestyle, and health characteristics across categories of serum osmolarity, US adults  $\geq 60$  years old, NHANES 2011-2014.**

|                                                | Sosm:<br><285 mmol/L<br>(n=125) |      | Sosm:<br>285-289 mmol/L<br>(n=377) |      | Sosm:<br>290-294 mmol/L<br>(n=896) |      | Sosm:<br>295-300 mmol/L<br>(n=793) |      | Sosm:<br>>300 mmol/L<br>(n=315) |      |
|------------------------------------------------|---------------------------------|------|------------------------------------|------|------------------------------------|------|------------------------------------|------|---------------------------------|------|
|                                                | Weighted<br>Means               | SE   | Weighted<br>Means                  | SE   | Weighted<br>Means                  | SE   | Weighted<br>Means                  | SE   | Weighted<br>Means               | SE   |
| Kilocalories                                   | 1863                            | 107  | 1947                               | 75   | 1848                               | 23   | 1901                               | 44   | 1863                            | 51   |
| Caffeine (mg)                                  | 211                             | 28   | 193                                | 23   | 184                                | 12   | 177                                | 10   | 153                             | 17   |
| Alcohol (g)                                    | 12                              | 4    | 9                                  | 1    | 8                                  | 1    | 6                                  | 1    | 7                               | 2    |
| Total water intake moisture (gm)               | 3142                            | 113  | 2870                               | 94   | 2727                               | 70   | 2639                               | 82   | 2438                            | 73   |
| Meeting EFSA AI <sup>b</sup>                   | 72.2%                           | 4.2% | 66.5%                              | 3.3% | 62.4%                              | 2.6% | 57.3%                              | 2.9% | 50.5%                           | 3.5% |
| $\geq 1$ ml/kcal and $\geq 1500$ mL/day        | 82.5%                           | 4.8% | 74.5%                              | 3.4% | 71.8%                              | 2.5% | 71.1%                              | 2.1% | 66.5%                           | 3.4% |
| Blood Glucose (mmol/L)                         | 5.3                             | 0.2  | 5.3                                | 0.1  | 5.7                                | 0.1  | 6.2                                | 0.1  | 7.8                             | 0.2  |
| Diabetes (Diagnosed or HbA1c<br>$\geq 6.5\%$ ) | 7.6%                            | 2.5% | 11.8%                              | 2.2% | 17.5%                              | 1.7% | 22.0%                              | 1.9% | 43.4%                           | 3.8% |
| Sodium (mmol/L)                                | 133.7                           | 0.2  | 137.6                              | 0.1  | 139.4                              | 0.1  | 140.9                              | 0.1  | 141.9                           | 0.2  |
| Low sodium (<135 mmol/L)                       | 44.4%                           | 6.1% | 1.8%                               | 0.7% | 0.7%                               | 0.5% | 0.2%                               | 0.1% | 0.4%                            | 0.3% |
| High sodium (>145 mmol/L)                      | 0.0%                            | 0.0% | 0.0%                               | 0.0% | 0.0%                               | 0.0% | 0.0%                               | 0.0% | 4.1%                            | 1.8% |
| Potassium (mmol/L)                             | 4.0                             | 0.1  | 3.9                                | 0.0  | 4.0                                | 0.0  | 4.1                                | 0.0  | 4.3                             | 0.0  |
| Blood Urea Nitrogen (mmol/L)                   | 4.2                             | 0.2  | 4.8                                | 0.1  | 5.2                                | 0.1  | 6.1                                | 0.1  | 8.4                             | 0.3  |
| eGFR (mL/min/1.73 m <sup>2</sup> )             | 80.1                            | 1.8  | 78.2                               | 0.6  | 76.5                               | 0.6  | 71.7                               | 0.6  | 59.3                            | 2.0  |
| eGFR <60 mL/min/1.73 m <sup>2</sup>            | 13.2%                           | 3.5% | 14.3%                              | 1.8% | 15.7%                              | 1.7% | 24.2%                              | 2.1% | 49.1%                           | 4.9% |
| Hours fasting at time of blood draw            | 5.9                             | 0.6  | 6.7                                | 0.4  | 7.3                                | 0.3  | 7.7                                | 0.2  | 7.6                             | 0.4  |

**Supplemental Table 2:** Linear regression analyses estimating relationships between dehydration (Sosm>300 mmol/L) and cognitive performance test scores among women and men ≥60 years old, NHANES 2011-2014.<sup>a</sup>

| VARIABLES                          | Women (n=1,271) <sup>b</sup> |                  |                  |                  | Men (n=1,235) <sup>b</sup> |                  |                  |                  |
|------------------------------------|------------------------------|------------------|------------------|------------------|----------------------------|------------------|------------------|------------------|
|                                    | CERAD-IR                     | CERAD-DR         | AFT              | DSST             | CERAD-IR                   | CERAD-DR         | AFT              | DSST             |
| Sosm ≤300 mmol/L                   | REF                          | REF              | REF              | REF              | REF                        | REF              | REF              | REF              |
| Sosm >300 mmol/L                   | 0.8*<br>(0.4)                | 0.4<br>(0.3)     | -0.4<br>(0.4)    | -1.7<br>(1.2)    | 1.2**<br>(0.5)             | 0.5*<br>(0.3)    | -0.01<br>(0.6)   | 0.1<br>(1.2)     |
| Age (5 yrs)                        | -1.0***<br>(0.1)             | -0.5***<br>(0.1) | -1.1***<br>(0.1) | -4.7***<br>(0.3) | -1.0***<br>(0.1)           | -0.5***<br>(0.1) | -0.9***<br>(0.2) | -3.6***<br>(0.3) |
| < High school                      | REF                          | REF              | REF              | REF              | REF                        | REF              | REF              | REF              |
| High school graduate               | 1.5***<br>(0.4)              | 0.4*<br>(0.3)    | 1.6***<br>(0.3)  | 8.4***<br>(1.1)  | 0.4<br>(0.4)               | -0.2<br>(0.3)    | -0.3<br>(0.6)    | 7.5***<br>(1.8)  |
| Some college                       | 1.8***<br>(0.5)              | 0.6**<br>(0.2)   | 2.6***<br>(0.3)  | 12.4***<br>(1.3) | 1.9***<br>(0.5)            | 0.6***<br>(0.2)  | 2.4***<br>(0.6)  | 11.7***<br>(1.1) |
| College graduate+                  | 2.9***<br>(0.5)              | 1.1***<br>(0.3)  | 4.8***<br>(0.5)  | 15.4***<br>(1.5) | 2.1***<br>(0.6)            | 0.5*<br>(0.3)    | 3.9***<br>(0.5)  | 16.6***<br>(1.4) |
| Physical activity (≥150 mins/week) | 0.5*<br>(0.3)                | 0.3**<br>(0.1)   | 1.1***<br>(0.3)  | 3.1***<br>(0.8)  | 0.3<br>(0.3)               | 0.1<br>(0.2)     | 1.1**<br>(0.5)   | 2.8***<br>(0.9)  |
| Sleep, 7-8 hours                   | REF                          | REF              | REF              | REF              | REF                        | REF              | REF              | REF              |
| Sleep, ≤6 hours                    | -0.1<br>(0.3)                | 0.3*<br>(0.1)    | -0.2<br>(0.4)    | 0.03<br>(0.9)    | -0.4<br>(0.4)              | -0.01<br>(0.2)   | -0.4<br>(0.4)    | 0.3<br>(1.2)     |
| Sleep, ≥9 hours                    | -1.1**<br>(0.5)              | -0.3<br>(0.3)    | -1.2**<br>(0.5)  | -4.7***<br>(1.4) | -0.8*<br>(0.4)             | -1.1***<br>(0.3) | -0.7<br>(0.8)    | -1.4<br>(1.1)    |
| Diabetes (diagnosed or HbA1c≥6.5%) | -0.8**<br>(0.4)              | -0.7***<br>(0.2) | -0.4<br>(0.4)    | -4.2***<br>(1.1) | -0.4<br>(0.3)              | -0.3<br>(0.2)    | -0.5<br>(0.6)    | -3.2***<br>(1.1) |
| Caffeine, 0 mg <sup>c</sup>        | REF                          | REF              | REF              | REF              | REF                        | REF              | REF              | REF              |
| Caffeine, >0-200 mg <sup>c</sup>   | 0.9*<br>(0.5)                | 0.3<br>(0.2)     | 0.5<br>(0.5)     | 2.8**<br>(1.1)   | 0.1<br>(0.5)               | 0.3<br>(0.3)     | -0.8<br>(0.6)    | 0.5<br>(1.2)     |
| Caffeine, >200-400 mg <sup>c</sup> | 1.2**<br>(0.6)               | 0.4<br>(0.3)     | 0.9<br>(0.7)     | 5.5***<br>(1.5)  | 0.7<br>(0.4)               | 0.7**<br>(0.3)   | 0.2<br>(0.5)     | 1.3<br>(1.2)     |
| Caffeine, >400 mg <sup>c</sup>     | 1.0<br>(0.6)                 | 0.4*<br>(0.3)    | -0.2<br>(0.9)    | -0.1<br>(2.0)    | -0.03<br>(0.6)             | 0.2<br>(0.3)     | -0.2<br>(0.7)    | -1.1<br>(1.8)    |
| Alcohol, 0 g <sup>c</sup>          | REF                          | REF              | REF              | REF              | REF                        | REF              | REF              | REF              |
| Alcohol, >0-30 g <sup>c</sup>      | -0.1<br>(0.5)                | 0.1<br>(0.2)     | 0.3<br>(0.5)     | 3.0**<br>(1.3)   | -0.02<br>(0.4)             | -0.1<br>(0.3)    | 0.5<br>(0.5)     | 1.2<br>(1.2)     |
| Alcohol, >30 g <sup>c</sup>        | -0.4<br>(0.7)                | -0.5<br>(0.4)    | -0.1<br>(0.6)    | 2.9<br>(2.2)     | -0.2<br>(0.4)              | 0.2<br>(0.3)     | 0.6<br>(0.7)     | 2.4<br>(1.7)     |
| R-squared                          | 0.20                         | 0.19             | 0.30             | 0.47             | 0.19                       | 0.19             | 0.23             | 0.45             |

Standard errors in parentheses

\*\*\*  $P < 0.01$ , \*\*  $P < 0.05$ , \*  $P < 0.1$ 

Notes: Constant not shown; REF=Reference category; CERAD-IR=Consortium to Establish a Registry for Alzheimer's Disease (CERAD) Word Learning- Immediate Recall; CERAD-DR=CERAD Word Learning - Delayed Recall; AFT=Animal Fluency Test. DSST=Digit Symbol Substitution Test.

<sup>a</sup> Adjusted for covariates shown and covariates not shown (race/Hispanic origin, time of exam, number of hours between last meal and blood draw, and BMI).

<sup>b</sup> Unweighted sample size

<sup>c</sup> Estimated from one 24 hour-recall on foods and beverages consumed from midnight to midnight the day prior to the exam.

**Supplemental Table 3:** Quadratic relationships between calculated serum osmolarity (Sosm) and cognitive performance test scores among women and men  $\geq 60$  years old, NHANES 2011-2014.<sup>a</sup>

| VARIABLES                                   | Women (n=1,271) <sup>b</sup> |                    |                   |                   | Men (n=1,235) <sup>b</sup> |                     |                   |                    |
|---------------------------------------------|------------------------------|--------------------|-------------------|-------------------|----------------------------|---------------------|-------------------|--------------------|
|                                             | CERAD-IR                     | CERAD-DR           | AFT               | DSST              | CERAD-IR                   | CERAD-DR            | AFT               | DSST               |
| Sosm (mmol/L)                               | 0.7<br>(1.1)                 | 0.2<br>(0.8)       | 0.8<br>(1.5)      | 10.0**<br>(4.0)   | -0.2<br>(1.2)              | 0.6<br>(0.5)        | 0.8<br>(1.4)      | 8.4**<br>(3.1)     |
| Sosm squared                                | -0.001<br>(0.002)            | -0.0002<br>(0.001) | -0.001<br>(0.002) | -0.02**<br>(0.01) | 0.0004<br>(0.002)          | -0.0009<br>(0.0009) | -0.001<br>(0.002) | -0.01**<br>(0.005) |
| Age (5 yrs)                                 | -1.0***<br>(0.1)             | -0.5***<br>(0.1)   | -1.1***<br>(0.1)  | -4.7***<br>(0.3)  | -1.0***<br>(0.1)           | -0.5***<br>(0.1)    | -0.9***<br>(0.2)  | -3.7***<br>(0.3)   |
| < High school                               | REF                          | REF                | REF               | REF               | REF                        | REF                 | REF               | REF                |
| High school graduate                        | 1.4***<br>(0.4)              | 0.4*<br>(0.2)      | 1.6***<br>(0.4)   | 8.0***<br>(1.1)   | 0.4<br>(0.4)               | -0.2<br>(0.3)       | -0.3<br>(0.6)     | 7.5***<br>(1.8)    |
| Some college                                | 1.8***<br>(0.5)              | 0.6**<br>(0.2)     | 2.6***<br>(0.3)   | 12.1***<br>(1.2)  | 1.9***<br>(0.5)            | 0.6***<br>(0.2)     | 2.4***<br>(0.6)   | 11.6***<br>(1.2)   |
| College graduate+                           | 2.9***<br>(0.4)              | 1.0***<br>(0.3)    | 4.7***<br>(0.5)   | 14.9***<br>(1.5)  | 2.1***<br>(0.6)            | 0.5*<br>(0.3)       | 3.9***<br>(0.5)   | 16.6***<br>(1.4)   |
| Physical activity ( $\geq 150$ mins/week)   | 0.5*<br>(0.3)                | 0.3**<br>(0.1)     | 1.1***<br>(0.3)   | 3.0***<br>(0.8)   | 0.3<br>(0.3)               | 0.2<br>(0.1)        | 1.1**<br>(0.5)    | 2.9***<br>(0.9)    |
| Sleep, 7-8 hours                            | REF                          | REF                | REF               | REF               | REF                        | REF                 | REF               | REF                |
| Sleep, $\leq 6$ hours                       | -0.1<br>(0.3)                | 0.3**<br>(0.1)     | -0.2<br>(0.4)     | -0.1<br>(0.9)     | -0.3<br>(0.4)              | 0.02<br>(0.2)       | -0.4<br>(0.4)     | 0.3<br>(1.2)       |
| Sleep, $\geq 9$ hours                       | -1.1**<br>(0.5)              | -0.3<br>(0.3)      | -1.3**<br>(0.5)   | -5.0***<br>(1.5)  | -0.6<br>(0.5)              | -1.0***<br>(0.3)    | -0.6<br>(0.8)     | -1.0<br>(1.1)      |
| Diabetes (diagnosed or HbA1c $\geq 6.5\%$ ) | -0.7*<br>(0.4)               | -0.6***<br>(0.2)   | -0.5<br>(0.5)     | -4.0***<br>(1.1)  | -0.4<br>(0.4)              | -0.3<br>(0.2)       | -0.5<br>(0.6)     | -3.2***<br>(1.1)   |
| Caffeine, 0 mg <sup>c</sup>                 | REF                          | REF                | REF               | REF               | REF                        | REF                 | REF               | REF                |
| Caffeine, >0-200 mg <sup>c</sup>            | 0.9*<br>(0.5)                | 0.3<br>(0.2)       | 0.5<br>(0.5)      | 2.9**<br>(1.1)    | 0.2<br>(0.5)               | 0.4<br>(0.3)        | -0.7<br>(0.6)     | 0.6<br>(1.2)       |
| Caffeine, >200-400 mg <sup>c</sup>          | 1.3**<br>(0.5)               | 0.4<br>(0.3)       | 0.9<br>(0.7)      | 5.5***<br>(1.4)   | 0.7<br>(0.5)               | 0.7**<br>(0.3)      | 0.2<br>(0.6)      | 1.3<br>(1.2)       |
| Caffeine, >400 mg <sup>c</sup>              | 1.0<br>(0.7)                 | 0.4*<br>(0.3)      | -0.2<br>(0.9)     | -0.2<br>(2.0)     | 0.1<br>(0.6)               | 0.2<br>(0.3)        | -0.2<br>(0.8)     | -0.9<br>(1.9)      |
| Alcohol, 0 g <sup>c</sup>                   | REF                          | REF                | REF               | REF               | REF                        | REF                 | REF               | REF                |
| Alcohol, >0-30 g <sup>c</sup>               | -0.1<br>(0.5)                | 0.1<br>(0.2)       | 0.3<br>(0.5)      | 3.1**<br>(1.3)    | -0.1<br>(0.4)              | -0.1<br>(0.3)       | 0.5<br>(0.5)      | 1.0<br>(1.3)       |
| Alcohol, >30 g <sup>c</sup>                 | -0.4<br>(0.7)                | -0.5<br>(0.4)      | -0.1<br>(0.6)     | 2.8<br>(2.3)      | -0.2<br>(0.4)              | 0.2<br>(0.3)        | 0.6<br>(0.7)      | 2.5<br>(1.6)       |
| R-squared                                   | 0.20                         | 0.19               | 0.30              | 0.48              | 0.19                       | 0.19                | 0.23              | 0.46               |

Standard errors in parentheses  
 \*\*\*  $P < 0.01$ , \*\*  $P < 0.05$ , \*  $P < 0.1$

Notes: Constant not shown; REF=Reference category; CERAD-IR=Consortium to Establish a Registry for Alzheimer's Disease (CERAD) Word Learning– Immediate Recall; CERAD-DR=CERAD Word Learning – Delayed Recall; AFT=Animal Fluency Test. DSST=Digit Symbol Substitution Test.

<sup>a</sup> Adjusted for covariates shown and covariates not shown (race/Hispanic origin, time of exam, number of hours between last meal and blood draw, and BMI).

<sup>b</sup> Unweighted sample size

<sup>c</sup> Estimated from one 24 hour-recall on foods and beverages consumed from midnight to midnight the day prior to the exam.

**Supplemental Table 4:** Sensitivity analyses estimating relationships between calculated serum osmolarity (Sosm) and cognitive performance test scores among women and men  $\geq 60$  years old, NHANES 2011-2014

| VARIABLES                                   | Women (n=1,201) <sup>b</sup> |                  |                  |                  | Men (n=1,160) <sup>b</sup> |                  |                  |                  |
|---------------------------------------------|------------------------------|------------------|------------------|------------------|----------------------------|------------------|------------------|------------------|
|                                             | CERAD-<br>IR                 | CERAD-<br>DR     | AFT              | DSST             | CERAD-<br>IR               | CERAD-<br>DR     | AFT              | DSST             |
|                                             | Calculated Sosm              |                  |                  |                  |                            |                  |                  |                  |
| 285-289 mmol/L                              | REF                          | REF              | REF              | REF              | REF                        | REF              | REF              | REF              |
| <285 mmol/L                                 | 0.1<br>(0.6)                 | 0.2<br>(0.3)     | 0.6<br>(0.8)     | -0.8<br>(2.3)    | -0.2<br>(1.1)              | 0.4<br>(0.5)     | 0.4<br>(1.0)     | -1.3<br>(4.3)    |
| 290-294 mmol/L                              | -0.2<br>(0.3)                | 0.1<br>(0.2)     | -1.2**<br>(0.5)  | -3.2***<br>(1.2) | 1.0<br>(0.6)               | 0.4*<br>(0.2)    | 1.0<br>(0.8)     | 1.6*<br>(1.0)    |
| 295-300 mmol/L                              | -0.1<br>(0.5)                | 0.1<br>(0.2)     | -0.2<br>(0.6)    | -3.0*<br>(1.5)   | 1.1**<br>(0.5)             | 0.7***<br>(0.2)  | 1.0<br>(0.8)     | 2.9**<br>(1.1)   |
| >300 mmol/L                                 | 0.9<br>(0.6)                 | 0.6*<br>(0.3)    | -0.7<br>(0.7)    | -3.5*<br>(2.0)   | 2.2***<br>(0.8)            | 1.1**<br>(0.4)   | 1.2<br>(0.9)     | 2.6*<br>(1.5)    |
| Age (5 yrs)                                 | -1.0***<br>(0.1)             | -0.5***<br>(0.1) | -1.1***<br>(0.1) | -4.7***<br>(0.3) | -0.9***<br>(0.1)           | -0.5***<br>(0.1) | -0.9***<br>(0.2) | -3.6***<br>(0.3) |
| < High school                               | REF                          | REF              | REF              | REF              | REF                        | REF              | REF              | REF              |
| High school graduate                        | 1.6***<br>(0.4)              | 0.4*<br>(0.2)    | 1.8***<br>(0.4)  | 9.0***<br>(1.1)  | 0.2<br>(0.4)               | -0.3<br>(0.3)    | -0.4<br>(0.6)    | 6.6***<br>(1.5)  |
| Some college                                | 1.6***<br>(0.5)              | 0.6**<br>(0.2)   | 2.5***<br>(0.4)  | 11.9***<br>(1.3) | 1.8***<br>(0.5)            | 0.5**<br>(0.2)   | 2.2***<br>(0.6)  | 11.6***<br>(1.3) |
| College graduate+                           | 2.6***<br>(0.4)              | 1.0***<br>(0.3)  | 4.6***<br>(0.5)  | 14.5***<br>(1.6) | 1.9***<br>(0.7)            | 0.4<br>(0.3)     | 3.6***<br>(0.6)  | 16.3***<br>(1.5) |
| Physical activity ( $\geq 150$ mins/week)   | 0.4<br>(0.3)                 | 0.3**<br>(0.1)   | 1.0***<br>(0.3)  | 2.8***<br>(0.7)  | 0.2<br>(0.3)               | 0.1<br>(0.1)     | 1.1**<br>(0.5)   | 2.7***<br>(0.9)  |
| Sleep, 7-8 hours                            | REF                          | REF              | REF              | REF              | REF                        | REF              | REF              | REF              |
| Sleep, $\leq 6$ hours                       | 0.01<br>(0.3)                | 0.3**<br>(0.1)   | -0.2<br>(0.4)    | 0.3<br>(0.8)     | -0.4<br>(0.4)              | 0.00<br>(0.2)    | -0.4<br>(0.4)    | -0.1<br>(1.1)    |
| Sleep, $\geq 9$ hours                       | -0.9*<br>(0.5)               | -0.3<br>(0.3)    | -1.0*<br>(0.5)   | -4.1***<br>(1.5) | -0.6<br>(0.4)              | -1.0***<br>(0.3) | -0.6<br>(0.9)    | -1.1<br>(1.3)    |
| Diabetes (diagnosed or HbA1c $\geq 6.5\%$ ) | -0.4<br>(0.4)                | -0.5***<br>(0.2) | -0.5<br>(0.5)    | -3.5***<br>(1.2) | -0.1<br>(0.4)              | -0.03<br>(0.2)   | -0.1<br>(0.6)    | -2.8**<br>(1.2)  |
| Caffeine, 0 mg <sup>c</sup>                 | REF                          | REF              | REF              | REF              | REF                        | REF              | REF              | REF              |
| Caffeine, >0-200 mg <sup>c</sup>            | 0.8<br>(0.5)                 | 0.2<br>(0.2)     | 0.3<br>(0.5)     | 2.6**<br>(1.1)   | 0.03<br>(0.5)              | 0.4<br>(0.3)     | -0.7<br>(0.6)    | -0.03<br>(1.3)   |
| Caffeine, >200-400 mg <sup>c</sup>          | 1.1*<br>(0.6)                | 0.3<br>(0.3)     | 0.8<br>(0.7)     | 5.6***<br>(1.5)  | 0.6<br>(0.5)               | 0.7**<br>(0.3)   | 0.3<br>(0.6)     | 0.9<br>(1.3)     |
| Caffeine, >400 mg <sup>c</sup>              | 1.0<br>(0.7)                 | 0.4<br>(0.3)     | -0.2<br>(0.8)    | -0.2<br>(2.1)    | 0.1<br>(0.6)               | 0.3<br>(0.3)     | 0.1<br>(0.7)     | -2.1<br>(2.0)    |
| Alcohol, 0 g <sup>c</sup>                   | REF                          | REF              | REF              | REF              | REF                        | REF              | REF              | REF              |
| Alcohol, >0-30 g <sup>c</sup>               | 0.2<br>(0.5)                 | 0.1<br>(0.2)     | 0.3<br>(0.5)     | 3.5**<br>(1.3)   | -0.2<br>(0.4)              | -0.2<br>(0.3)    | 0.5<br>(0.6)     | 0.8<br>(1.2)     |
| Alcohol, >30 g <sup>c</sup>                 | -0.7<br>(0.6)                | -0.6<br>(0.4)    | -0.3<br>(0.6)    | 2.0<br>(2.1)     | -0.2<br>(0.4)              | 0.2<br>(0.3)     | 0.5<br>(0.7)     | 2.5<br>(1.7)     |



|                                           |                |                |                  |                  |                 |                   |                |                |
|-------------------------------------------|----------------|----------------|------------------|------------------|-----------------|-------------------|----------------|----------------|
| Glucose (mmol/L)                          | -0.1<br>(0.1)  | -0.1<br>(0.1)  | -0.03<br>(0.1)   | -0.2<br>(0.2)    | -0.1<br>(0.1)   | -0.1***<br>(0.04) | -0.1<br>(0.1)  | -0.3<br>(0.3)  |
| Glucose squared                           | 0.01<br>(0.02) | 0.01<br>(0.01) | -0.005<br>(0.02) | -0.1**<br>(0.04) | 0.001<br>(0.01) | 0.01<br>(0.005)   | 0.01<br>(0.01) | 0.04<br>(0.03) |
| eGFR $\geq$ 60 mL/min/1.73 m <sup>2</sup> | REF            | REF            | REF              | REF              | REF             | REF               | REF            | REF            |
| eGFR <60 mL/min/1.73 m <sup>2</sup>       | -0.7*<br>(0.4) | -0.1<br>(0.1)  | -0.4<br>(0.4)    | -2.3**<br>(1.1)  | -0.8*<br>(0.4)  | -0.3<br>(0.2)     | -0.9*<br>(0.4) | -0.7<br>(0.9)  |
| R-squared                                 | 0.21           | 0.19           | 0.31             | 0.50             | 0.19            | 0.19              | 0.23           | 0.46           |

Standard errors in parentheses

\*\*\*  $P < 0.01$ , \*\*  $P < 0.05$ , \*  $P < 0.1$

Notes: Constant not shown; REF=Reference category; CERAD-IR=Consortium to Establish a Registry for Alzheimer's Disease (CERAD) Word Learning- Immediate Recall; CERAD-DR=CERAD Word Learning - Delayed Recall; AFT=Animal Fluency Test. DSST=Digit Symbol Substitution Test.

<sup>a</sup> This model includes covariates for eGFR<60 and blood glucose (mmol/L) and excludes participants who consumed fewer than 500 calories the day before, fasting for more than 18 hours, had blood glucose levels<3 mmol/L, and/or had a serum sodium level <135 mmol/L. Adjusting for covariates shown and covariates not shown (race/Hispanic origin, time of exam, number of hours between last meal and blood draw, and BMI).

<sup>b</sup> Unweighted sample size.

<sup>c</sup> Estimated from one 24 hour-recall on foods and beverages consumed from midnight to midnight the day prior to the exam.

**Supplemental Table 5:** Linear regression analyses estimating relationships between alternative measure of adequate water intake ( $\geq 1$  ml/kcal and minimum 1500 mL) and cognitive performance test scores among women and men  $\geq 60$  years old, NHANES 2011-2014.<sup>a</sup>

| VARIABLES                                   | Women (n=1,271) <sup>b</sup> |                  |                  |                  | Men (n=1,235) <sup>b</sup> |                  |                  |                  |
|---------------------------------------------|------------------------------|------------------|------------------|------------------|----------------------------|------------------|------------------|------------------|
|                                             | CERAD-IR                     | CERAD-DR         | AFT              | DSST             | CERAD-IR                   | CERAD-DR         | AFT              | DSST             |
| Meeting alternative AI <sup>c</sup>         | REF                          | REF              | REF              | REF              | REF                        | REF              | REF              | REF              |
| Not meeting alternative AI <sup>c</sup>     | -0.5*<br>(0.3)               | -0.2<br>(0.2)    | -1.0**<br>(0.4)  | -2.2**<br>(1.0)  | -0.01<br>(0.3)             | 0.03<br>(0.2)    | -0.7<br>(0.4)    | -1.5*<br>(0.8)   |
| Age (5 yrs)                                 | -1.0***<br>(0.1)             | -0.5***<br>(0.1) | -1.0***<br>(0.1) | -4.7***<br>(0.3) | -0.9***<br>(0.1)           | -0.5***<br>(0.1) | -0.9***<br>(0.2) | -3.5***<br>(0.2) |
| < High school                               | REF                          | REF              | REF              | REF              | REF                        | REF              | REF              | REF              |
| High school graduate                        | 1.4***<br>(0.5)              | 0.4<br>(0.3)     | 1.5***<br>(0.3)  | 8.2***<br>(1.1)  | 0.4<br>(0.4)               | -0.2<br>(0.3)    | -0.3<br>(0.6)    | 7.5***<br>(1.8)  |
| Some college                                | 1.7***<br>(0.5)              | 0.6**<br>(0.3)   | 2.5***<br>(0.3)  | 12.2***<br>(1.3) | 1.9***<br>(0.5)            | 0.6***<br>(0.2)  | 2.3***<br>(0.7)  | 11.4***<br>(1.2) |
| College graduate+                           | 2.7***<br>(0.5)              | 1.0***<br>(0.3)  | 4.6***<br>(0.5)  | 14.9***<br>(1.6) | 2.1***<br>(0.7)            | 0.5*<br>(0.3)    | 3.8***<br>(0.5)  | 16.4***<br>(1.4) |
| Physical activity ( $\geq 150$ mins/week)   | 0.4<br>(0.3)                 | 0.3**<br>(0.1)   | 1.0***<br>(0.3)  | 2.8***<br>(0.8)  | 0.2<br>(0.3)               | 0.1<br>(0.1)     | 1.0*<br>(0.5)    | 2.7***<br>(0.9)  |
| Sleep, 7-8 hours                            | REF                          | REF              | REF              | REF              | REF                        | REF              | REF              | REF              |
| Sleep, $\leq 6$ hours                       | -0.1<br>(0.3)                | 0.3**<br>(0.1)   | -0.2<br>(0.4)    | 0.1<br>(0.9)     | -0.4<br>(0.4)              | -0.00<br>(0.2)   | -0.3<br>(0.4)    | 0.3<br>(1.2)     |
| Sleep, $\geq 9$ hours                       | -1.1**<br>(0.5)              | -0.3<br>(0.3)    | -1.2**<br>(0.5)  | -4.8***<br>(1.4) | -0.7*<br>(0.4)             | -1.0***<br>(0.3) | -0.7<br>(0.8)    | -1.5<br>(1.1)    |
| Diabetes (diagnosed or HbA1c $\geq 6.5\%$ ) | -0.6*<br>(0.4)               | -0.6***<br>(0.2) | -0.5<br>(0.4)    | -4.4***<br>(1.1) | -0.2<br>(0.3)              | -0.2<br>(0.2)    | -0.4<br>(0.6)    | -3.1***<br>(1.1) |
| Caffeine, 0 mg <sup>d</sup>                 | REF                          | REF              | REF              | REF              | REF                        | REF              | REF              | REF              |
| Caffeine, >0-200 mg <sup>d</sup>            | 0.8<br>(0.5)                 | 0.2<br>(0.2)     | 0.3<br>(0.5)     | 2.3**<br>(1.0)   | 0.01<br>(0.5)              | 0.3<br>(0.3)     | -0.8<br>(0.6)    | 0.3<br>(1.1)     |
| Caffeine, >200-400 mg <sup>d</sup>          | 1.0*<br>(0.6)                | 0.3<br>(0.3)     | 0.6<br>(0.7)     | 4.6***<br>(1.4)  | 0.5<br>(0.4)               | 0.7**<br>(0.3)   | -0.00<br>(0.5)   | 0.8<br>(1.1)     |
| Caffeine, >400 mg <sup>d</sup>              | 0.6<br>(0.7)                 | 0.3<br>(0.3)     | -0.8<br>(0.8)    | -1.4<br>(1.9)    | -0.2<br>(0.6)              | 0.1<br>(0.3)     | -0.5<br>(0.7)    | -1.9<br>(1.8)    |
| Alcohol, 0 g <sup>d</sup>                   | REF                          | REF              | REF              | REF              | REF                        | REF              | REF              | REF              |
| Alcohol, >0-30 g <sup>d</sup>               | -0.2<br>(0.5)                | 0.01<br>(0.2)    | 0.1<br>(0.5)     | 2.7*<br>(1.4)    | -0.01<br>(0.4)             | -0.1<br>(0.3)    | 0.5<br>(0.5)     | 1.1<br>(1.3)     |
| Alcohol, >30 g <sup>d</sup>                 | -0.6<br>(0.7)                | -0.5<br>(0.4)    | -0.3<br>(0.7)    | 2.4<br>(2.3)     | -0.3<br>(0.4)              | 0.2<br>(0.3)     | 0.5<br>(0.7)     | 2.2<br>(1.6)     |
| R-squared                                   | 0.21                         | 0.19             | 0.31             | 0.48             | 0.18                       | 0.18             | 0.23             | 0.46             |

Standard errors in parentheses

\*\*\*  $P < 0.01$ , \*\*  $P < 0.05$ , \*  $P < 0.1$

Notes: Constant not shown. REF=Reference category; CERAD-IR=Consortium to Establish a Registry for Alzheimer's Disease (CERAD) Word Learning– Immediate Recall; CERAD-DR=CERAD Word Learning – Delayed Recall; AFT=Animal Fluency Test. DSST=Digit Symbol Substitution Test.

<sup>a</sup> Adjusted for covariates shown and covariates not shown (race/Hispanic origin, time of exam, number of hours between last meal and blood draw, BMI, and estimated calorie intake on previous day).

<sup>b</sup> Unweighted sample size

<sup>c</sup> Alternative AI defined as  $\geq 1$  ml/kcal and minimum 1500 mL of total water from foods and beverages. Estimated from one 24 hour-recall on foods and beverages consumed from midnight to midnight the day prior to the exam.

<sup>d</sup> Estimated from one 24 hour-recall on foods and beverages consumed from midnight to midnight the day prior to the exam.



|                                     |               |                 |               |                 |               |               |               |               |
|-------------------------------------|---------------|-----------------|---------------|-----------------|---------------|---------------|---------------|---------------|
| eGFR <60 mL/min/1.73 m <sup>2</sup> | -0.4<br>(0.3) | -0.006<br>(0.1) | -0.3<br>(0.4) | -2.2**<br>(1.0) | -0.5<br>(0.4) | -0.1<br>(0.2) | -0.8<br>(0.5) | -0.3<br>(0.8) |
| R-squared                           | 0.21          | 0.19            | 0.31          | 0.50            | 0.18          | 0.18          | 0.23          | 0.46          |

Standard errors in parentheses

\*\*\*  $P < 0.01$ , \*\*  $P < 0.05$ , \*  $P < 0.1$

Notes: Constant not shown; REF=Reference category; CERAD-IR=Consortium to Establish a Registry for Alzheimer's Disease (CERAD) Word Learning– Immediate Recall; CERAD-DR=CERAD Word Learning – Delayed Recall; AFT=Animal Fluency Test. DSST=Digit Symbol Substitution Test.

<sup>a</sup> This model includes covariates for eGFR<60 and blood glucose (mmol/L) and excludes participants who consumed fewer than 500 calories the day before, fasting for more than 18 hours, had blood glucose levels<3 mmol/L, and/or had a serum sodium level <135 mmol/L. Adjusting for covariates shown and covariates not shown (race/Hispanic origin, time of exam, number of hours between last meal and blood draw, BMI, and estimated calorie intake on previous day).

<sup>b</sup> Alternative AI defined as  $\geq 1$  ml/kcal and minimum 1500 mL of total water from foods and beverages. Estimated from one 24 hour-recall on foods and beverages consumed from midnight to midnight the day prior to the exam.

<sup>d</sup> Estimated from one 24 hour-recall on foods and beverages consumed from midnight to midnight the day prior to the exam.
